# Supplementary material for: Development of a Novel Benzimidazole-Based Probe and Portable Fluorimeter for the Detection of Cysteine in Human Urine
Source: MDPI journal article supplement (doi:10.3390/bios11110420), 2021-10-26
Supplement: s1 [file s1]

Supplementary Information

# Development of a Novel Benzimidazole-Based Probe and Portable Fluorimeter for the Detection of Cysteine in Human Urine

Gyu Seong Yeom<sup>1,†</sup>, In-ho Song<sup>1,†</sup>, Shrikant Dashrath Warkad<sup>2</sup>, Pramod B. Shinde<sup>3</sup>, Taewoon Kim<sup>4</sup>, Seong-min Park<sup>1</sup> and Satish Balasaheb Nimse<sup>1,\*</sup>

<sup>1</sup> Institute of Applied Chemistry and Department of Chemistry, Hallym University, Chuncheon 24252, Korea; m21019@hallym.ac.kr (G.S.Y.); songin-ho@hallym.ac.kr (I.-h.S.); psm3561@naver.com (S.-m.P.)

<sup>2</sup> Biometrix Technology, Inc., 2-2 Bio Venture Plaza 56, Chuncheon 24232, Korea; shrikant@bmtchip.com

<sup>3</sup> Natural Products & Green Chemistry Division, CSIR—Central Salt and Marine Chemicals Research Institute (CSIR-CSMCRI), Council of Scientific and Industrial Research (CSIR), Bhavnagar 364002, Gujarat, India; pramodshinde@csmcri.res.in

<sup>4</sup> School of Software, Hallym University, Chuncheon 24252, Korea; taewoon@hallym.ac.kr

\* Correspondence: satish\_nimse@hallym.ac.kr

† These authors contributed equally to this work.

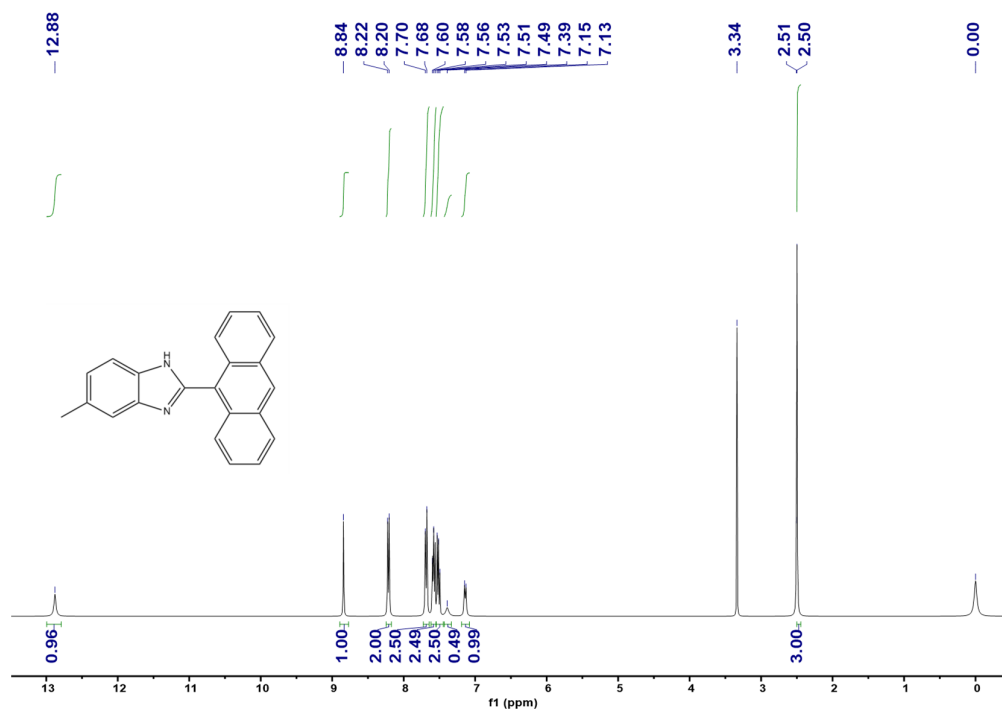

Figure S1. <sup>1</sup>H-NMR spectrum of compound 3.

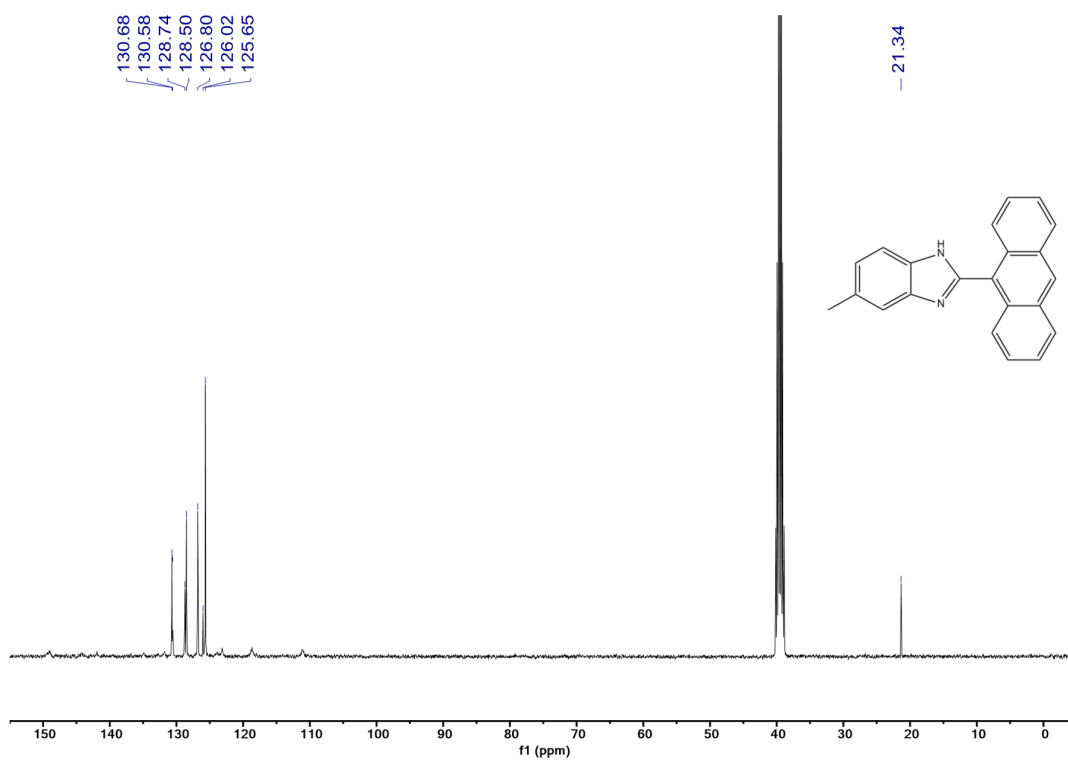

Figure S2. <sup>13</sup>C NMR spectrum of compound 3.

[ Mass Spectrum ]

Data : B HR Date : 24-Aug-2021 16:06

RT : 1.04 min Scan# : 28

Elements : C 22/20, H 45/16, N 2/0

Mass Tolerance : 1000ppm, 5mmu if m/z < 5, 50mmu if m/z > 50

Unsaturation (U.S.) : -0.5 - 20.0

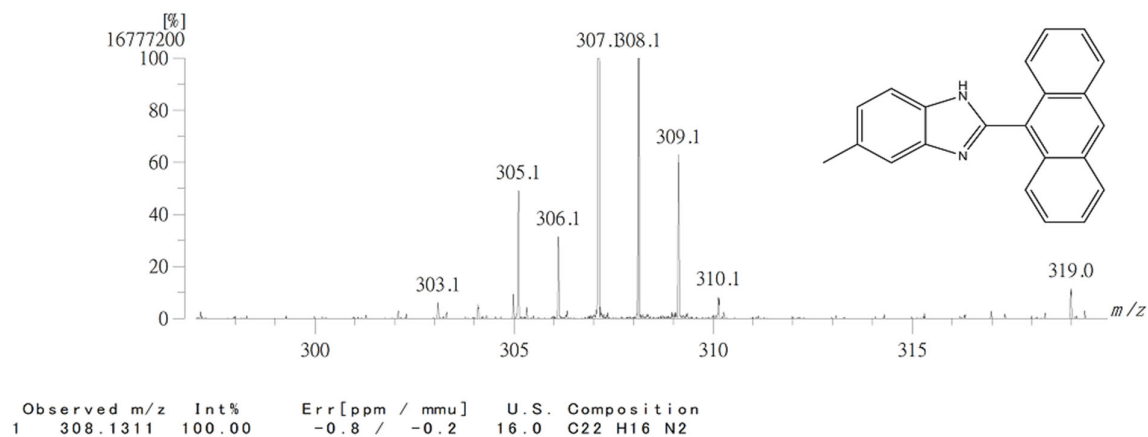

Figure S3. HR-mass spectrum of compound 3.

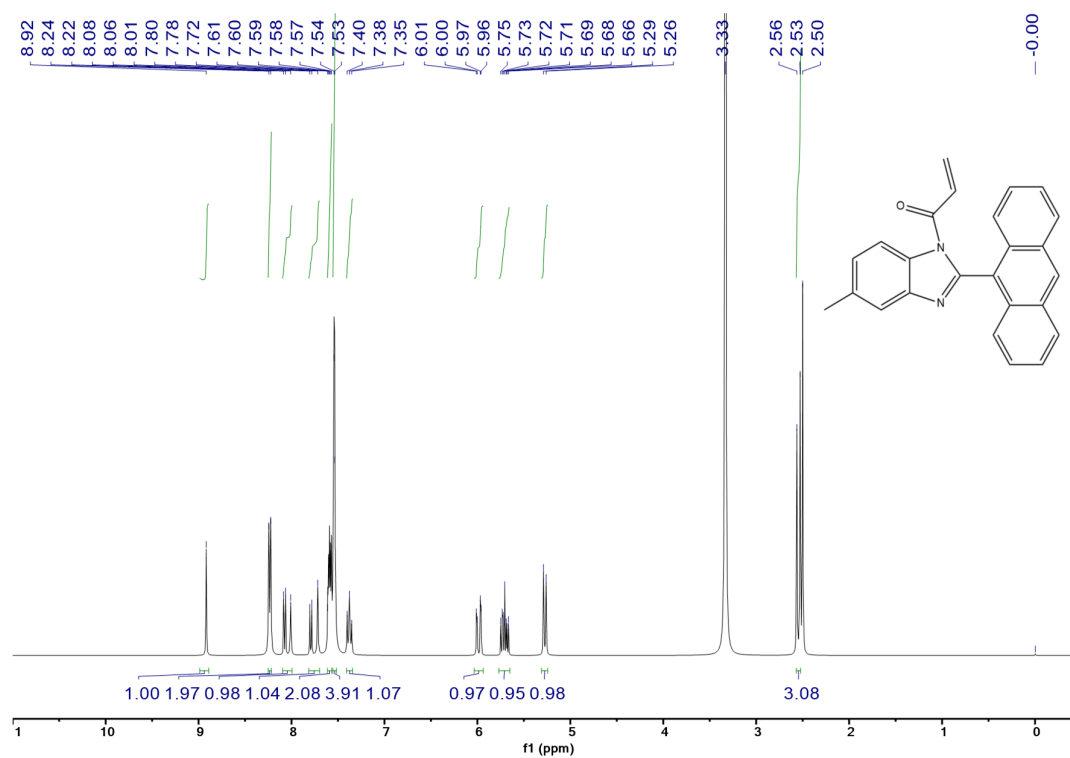

Figure S4. <sup>1</sup>H-NMR spectrum of ABIA.

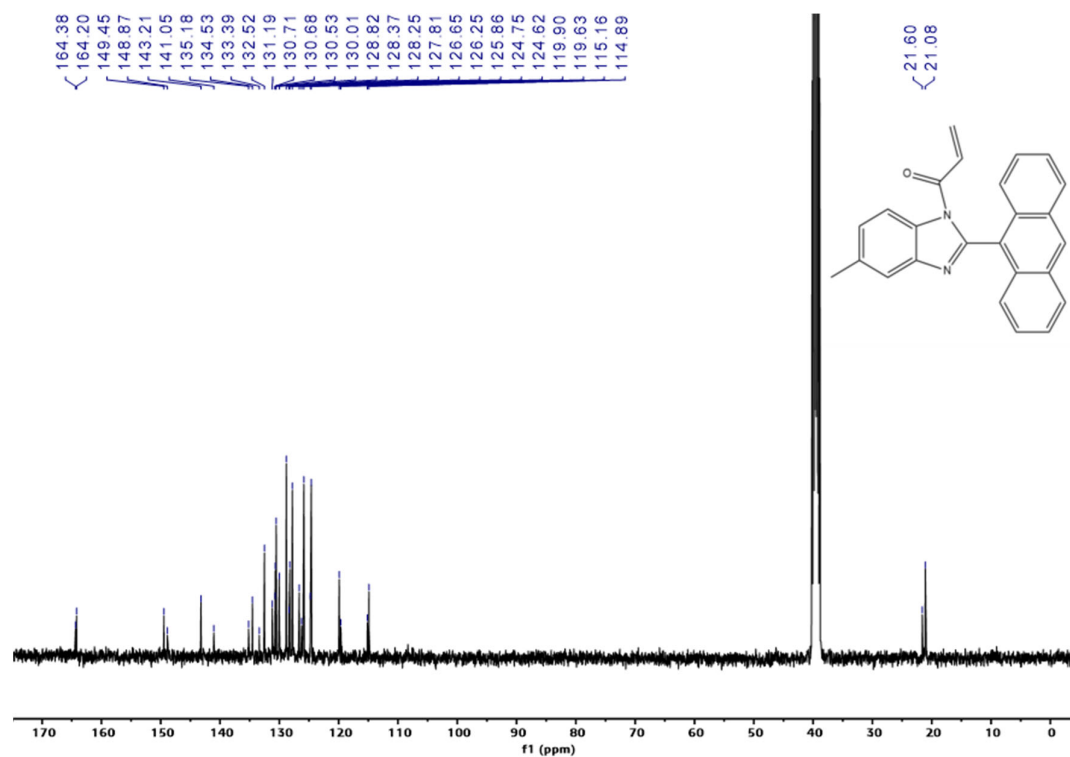

Figure S5. <sup>13</sup>C-NMR spectrum of ABIA.

[ Mass Spectrum ]  
 Data : B-Ac HR Date : 24-Aug-2021 16:27  
 RT : 1.61 min Scan# : 43  
 Elements : C 25/20, H 51/16, N 2/0, O 1/0  
 Mass Tolerance : 1000ppm, 5mmu if m/z < 5, 50mmu if m/z > 50  
 Unsaturation (U.S.) : -0.5 - 20.0

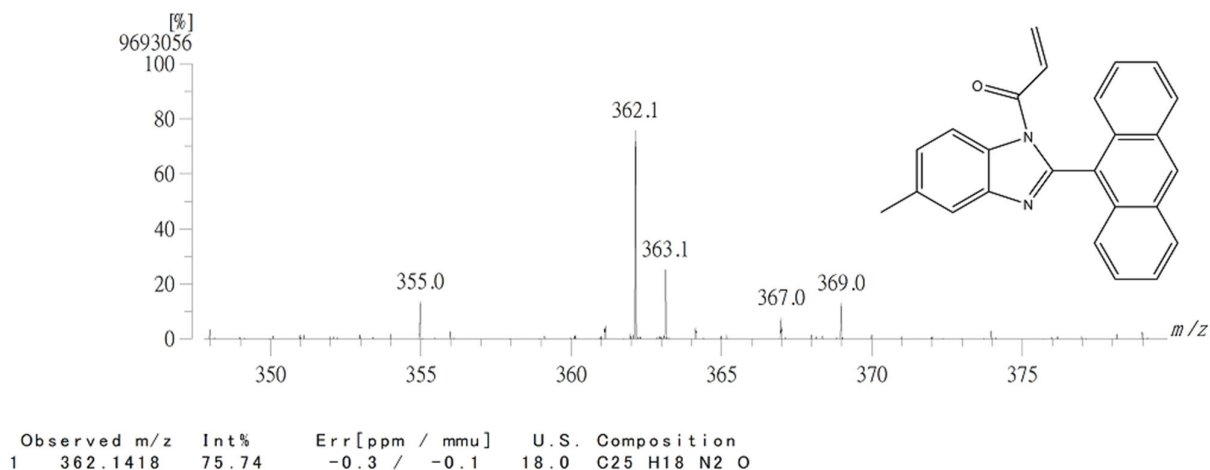

Figure S6. HR-mass spectrum of receptor ABIA.

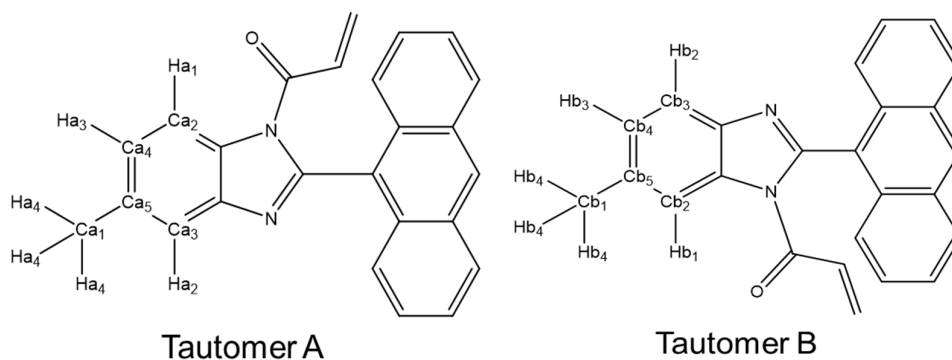

Figure S7. Structures of the probe ABIA tautomer's A and B.

Table S1. <sup>1</sup>H NMR and <sup>13</sup>C NMR chemical shifts (δ ppm) of the ABIA tautomer's A and B.

| Compound                                  | ABIA               |            |                     |            |
|-------------------------------------------|--------------------|------------|---------------------|------------|
|                                           | <sup>1</sup> H NMR |            | <sup>13</sup> C NMR |            |
|                                           | Tautomer A         | Tautomer B | Tautomer A          | Tautomer B |
| H[a,b] <sub>1</sub> / C[a,b] <sub>1</sub> | 8.06               | 7.80       | 130.71              | 130.68     |
| H[a,b] <sub>2</sub> / C[a,b] <sub>2</sub> | 8.01               | 7.72       | 124.75              | 124.62     |
| H[a,b] <sub>3</sub> / C[a,b] <sub>3</sub> | 7.40               | 7.35       | 119.90              | 119.63     |
| H[a,b] <sub>4</sub> / C[a,b] <sub>4</sub> | 2.56               | 2.53       | 115.16              | 114.89     |
| C[a,b] <sub>5</sub>                       | -                  | -          | 21.60               | 21.08      |

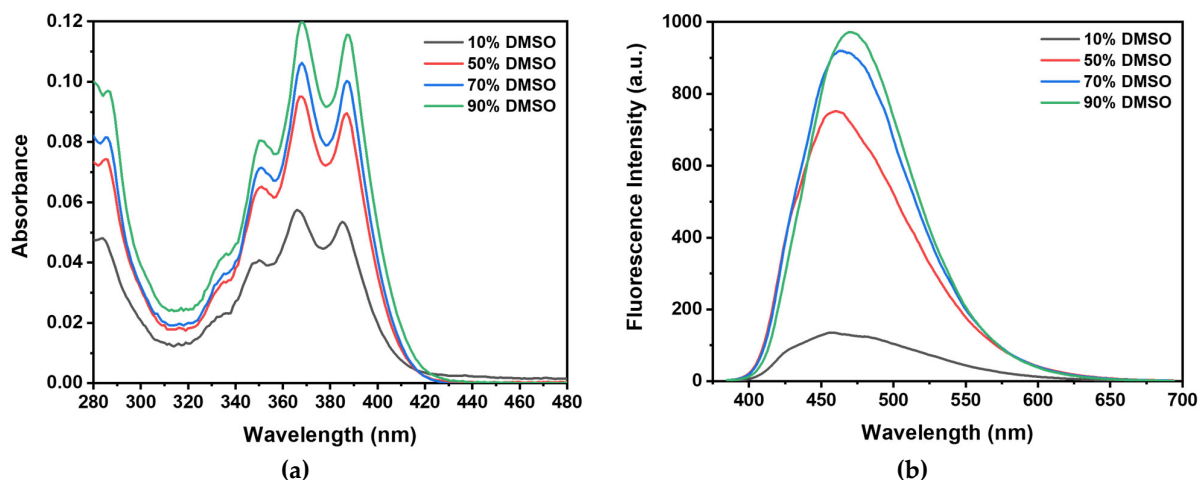

**Figure S8.** (a) UV-vis absorbance spectra, (b) Fluorescence spectra of compound **3** in 10, 50, 70, and 90% DMSO:0.01 M HEPES buffer solution ( $\lambda_{\text{ex}} = 368$  nm).

**Table S2.** Photophysical properties of compound **3** ( $10 \times 10^{-6}$  M) in varying percentages of DMSO:0.01 M HEPES buffer solution.

| DMSO Percentage (%) | $\lambda_{\text{max}}$ (nm) | $\epsilon \times 10^4$ [ $\text{M}^{-1} \text{cm}^{-1}$ ] | $\lambda_{\text{em}}$ (nm) | Stoke's shift (nm) |
|---------------------|-----------------------------|-----------------------------------------------------------|----------------------------|--------------------|
| 10%                 | 368                         | 0.56                                                      | 458                        | 90                 |
| 50%                 | 368                         | 0.95                                                      | 460                        | 92                 |
| 70%                 | 368                         | 1.06                                                      | 462                        | 94                 |
| 90%                 | 368                         | 1.20                                                      | 470                        | 102                |

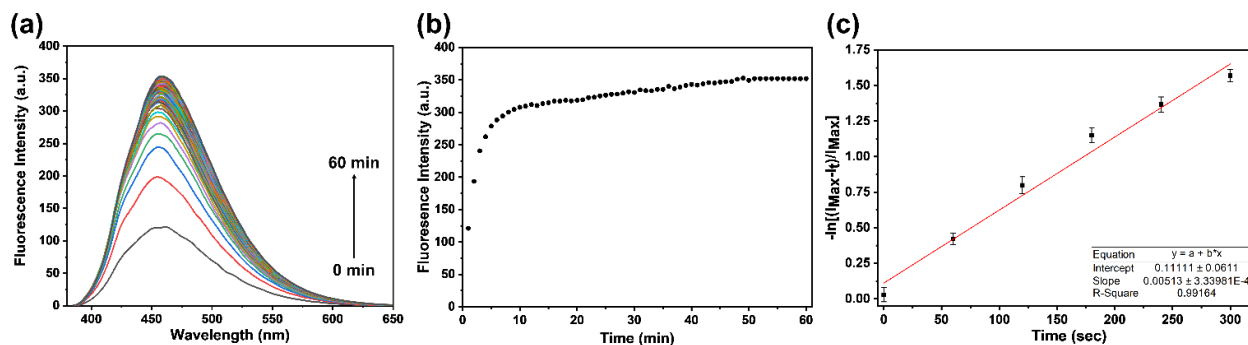

**Figure S9.** (a), (b) Time-dependent fluorescence response and (c) pseudo-first-order kinetic plots of **ABIA** ( $10 \times 10^{-6}$  M) reaction with **Cys** ( $50 \times 10^{-6}$  M) in 90% DMSO:0.01 M HEPES buffer solution ( $\lambda_{\text{ex}} = 368$  nm,  $\lambda_{\text{em}} = 455$  nm).

[ Mass Spectrum ]  
 Data : B Date : 03-Sep-2021 14:16  
 RT : 1.04 min Scan# : 26-k((45,71))[k=1.0]

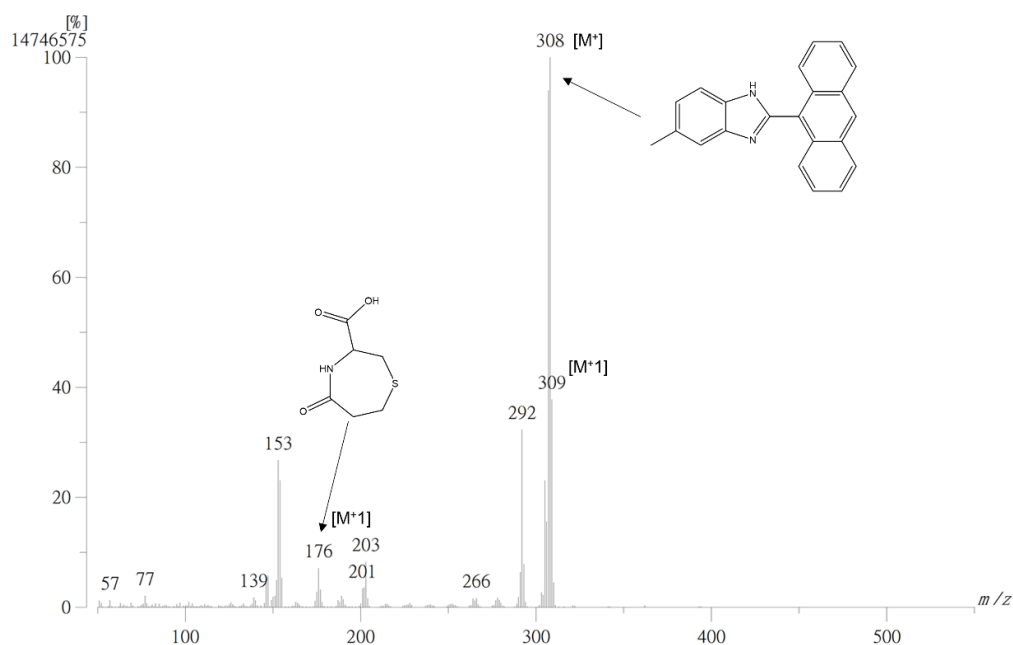

**Figure S10.** Mass spectra of a reaction product obtained by reacting equimolar **ABIA** and Cys for 60 min at 25 °C.

**Table S3.** A comparison of response time for cysteine detection by various methods.

| Sr. No. | Probe                                                                               | Response Time (min) | Rate Constant (s <sup>-1</sup> ) | Ref. |
|---------|-------------------------------------------------------------------------------------|---------------------|----------------------------------|------|
| 1       | 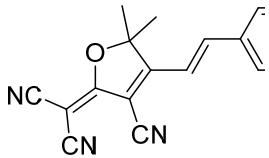 | 90                  | $8.16 \times 10^{-4}$            | [1]  |
| 2       |  | 80                  | $7.16 \times 10^{-4}$            | [2]  |
| 3       |  | 30                  | $2.70 \times 10^{-3}$            | [3]  |
| 4       |  | 20                  | $1.1 \times 10^{-2}$             | [4]  |

|      |                                                                                   |    |                       |           |
|------|-----------------------------------------------------------------------------------|----|-----------------------|-----------|
| 5    | 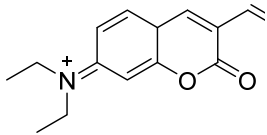 | 15 | $2.3 \times 10^{-3}$  | [5]       |
| ABIA |  | 10 | $5.13 \times 10^{-3}$ | This Work |

**Table S4.** A comparison of different probes used for cysteine detection.

| Sr. No. | Probe                                                                               | LOD (nM) | Urine Test | Live Cell Imaging | Ref. |
|---------|-------------------------------------------------------------------------------------|----------|------------|-------------------|------|
| 1       | 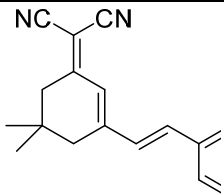   | 260      | No         | Yes               | [6]  |
| 2       |  | 40       | No         | Yes               | [7]  |
| 3       |  | 48       | No         | Yes               | [8]  |
| 4       |  | 48.9     | Yes        | Yes               | [9]  |

|      |                                                                                   |      |     |     |           |
|------|-----------------------------------------------------------------------------------|------|-----|-----|-----------|
| 5    | 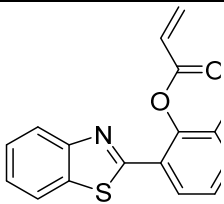 | 110  | No  | Yes | [10]      |
| ABIA |  | 16.3 | Yes | Yes | This Work |

<sup>a</sup>—not reported.

## References

1. Yang, S.; Zeng, Q.; Guo, Q.; Chen, S.; Liu, H.; Liu, M.; McMahon, M.T.; Zhou, X. Detection and differentiation of Cys, Hcy and GSH mixtures by (19)F NMR probe. *Talanta* **2018**, *184*, 513–519, doi:10.1016/j.talanta.2018.03.039.
2. Tang, L.; Xu, D.; Tian, M.; Yan, X. A mitochondria-targetable far-red emissive fluorescence probe for highly selective detection of cysteine with a large Stokes shift. *J. Lumin.* **2019**, *208*, 502–508, doi:10.1016/j.jlumin.2019.01.022.
3. Zeng, R.F.; Lan, J.S.; Li, X.D.; Liang, H.F.; Liao, Y.; Lu, Y.J.; Zhang, T.; Ding, Y. A Fluorescent Coumarin-Based Probe for the Fast Detection of Cysteine with Live Cell Application. *Molecules* **2017**, *22*, 1618, doi:10.3390/molecules22101618.
4. Qiao, H.; Meng, Y.; Zhang, Y.; Sun, J.; Wang, T.; Zhang, X.; Wang, F.; Kang, Y.-F. A simple coumarin-based fluorescent probe for specific detection of cysteine over homocysteine and glutathione. *Chem. Pap.* **2018**, *72*, 1461–1466, doi:10.1007/s11696-018-0401-2.
5. A, A.H.; Ali, F.; Kushwaha, S.; Taye, N.; Chattopadhyay, S.; Das, A. A Cysteine-Specific Fluorescent Switch for Monitoring Oxidative Stress and Quantification of Aminoacylase-1 in Blood Serum. *Anal. Chem.* **2016**, *88*, 12161–12168, doi:10.1021/acs.analchem.6b03066.
6. Zhang, W.; Liu, J.; Yu, Y.; Han, Q.; Cheng, T.; Shen, J.; Wang, B.; Jiang, Y. A novel near-infrared fluorescent probe for highly selective detection of cysteine and its application in living cells. *Talanta* **2018**, *185*, 477–482. doi: 10.1016/j.talanta.2018.04.001.
7. Zhang, B.; Zhang, H.; Zhong, M.; Wang, S.; Xu, Q.; Cho, D.-H.; Qiu, H. A novel off-on fluorescent probe for specific detection and imaging of cysteine in live cells and in vivo. *Chin. Chem. Let.* **2020**, *31*, 133–135, 10.1016/j.ccllet.2019.05.061.
8. Qi, Y.; Huang, Y.; Li, B.; Zeng, F.; Wu, S. Real-Time Monitoring of Endogenous Cysteine Levels In Vivo by near-Infrared Turn-on Fluorescent Probe with Large Stokes Shift. *Anal. Chem.* **2018**, *90*, 1014–1020. doi: 10.1021/acs.analchem.7b04407.
9. Dai, Y.; Zheng, Y.; Xue, T.; He, F.; Ji, H.; Qi, Z. A novel fluorescent probe for rapidly detection cysteine in cystinuria urine, living cancer/normal cells and BALB/c nude mice. *Spectrochim. Acta A Mol. Biomol. Spectrosc.* **2020**, *225*, 117490. doi: 10.1016/j.saa.2019.117490.
10. Yang, X.; Guo, Y.; Strongin, R.M. Conjugate addition/cyclization sequence enables selective and simultaneous fluorescence detection of cysteine and homocysteine. *Angew. Chem. Int. Ed. Engl.* **2011**, *50*, 10690–10693.
